# Supplementary material for: Facile preparation of hybrid porous polyanilines for highly efficient Cr(vi) removal
Source: Royal Society of Chemistry journal article supplement (doi:10.1039/c8ra07026a), 2018-01-01
Supplement: c8ra07026a1.pdf [file c8ra07026a1.pdf]

## Electronic Supplementary Information

### Facile Preparation of Hybrid Porous Polyanilines for High Efficient Cr(VI) Removal

Wenjie Tang,<sup>a</sup> Yue Wu,<sup>a\*</sup> Tingting Gao,<sup>a</sup> Yingqing Wei,<sup>a</sup> Guowei Zhou<sup>a\*</sup>

<sup>[a]</sup> Key Laboratory of Fine Chemicals in Universities of Shandong, School of Chemistry and Pharmaceutical Engineering, Qilu University of Technology (Shandong Academy of Sciences), Jinan 250353, Shandong, People's Republic of China.

E-mails: yuewu\_007@qlu.edu.cn; gwzhou@qlu.edu.cn; guoweizhou@hotmail.com

#### Structure characterization

Fourier-transformed infrared (FT-IR) spectra were performed on a Bruker TENSOR27 infrared spectrophotometer from 400 to 4000  $\text{cm}^{-1}$  at a resolution of 4  $\text{cm}^{-1}$  by KBr disk method. UV-Vis spectra were recorded by Shimadzu UV-2600 UV-vis spectrometer and the concentration of Cr(VI) solution was measured using UV-vis spectrophotometer at 540 nm. Field-emission scanning electron microscopy (FE-SEM) graphics were recorded by a HITACHI S4800 spectrometer. Thermal gravimetric analysis (TGA) was performed on a Mettler Toledo model SDTA 854 TGA system under  $\text{N}_2$  atmosphere at a heating rate of 10  $^\circ\text{C min}^{-1}$  from ambient temperature to 1000  $^\circ\text{C}$ . Powder X-ray diffraction (PXRD) images were recorded with a Rigaku D/MAX 2550 diffractometer under  $\text{Cu-K}\alpha$  radiation, 40 kV, and 200 mA with a scanning rate of 10 $^\circ \text{min}^{-1}$ .  $\text{N}_2$  adsorption-desorption experiment was performed on a Micro Meritics surface area and pore size analyzer. The surface area and pore size distribution were calculated by using the Brunauer-Emmet-Teller (BET) equation and Nonlocal density functional theory (NL-DFT) on the basis of the adsorption isotherm. The X-ray photoelectron spectroscopy (XPS) was conducted on a Thermo ESCALAB 250Xi, operating at 15 kV and 15 mA with an alumina target ( $\text{Al-K}\alpha$ ,  $h\nu = 1486.6 \text{ eV}$ ), The binding energy of the C 1s peak at 284.8 eV was used as the reference. The spectrum decomposition was performed using the XPS Peak 41 program with Gaussian functions after subtraction of a Shirley background.

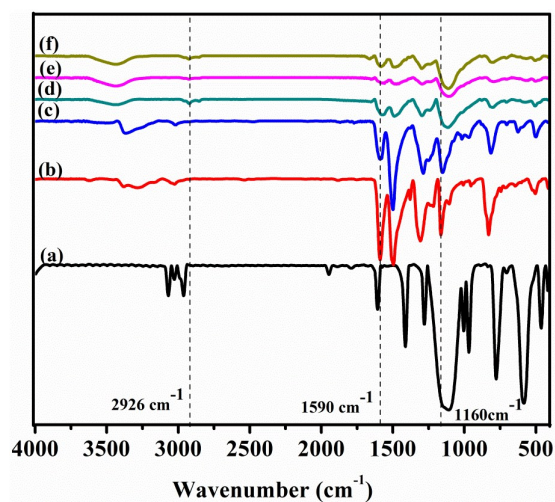

**Fig S1.** FT-IR spectra of (a) OVS; (b) emeraldine; (c) leucoemeraldine; (d) LHPP-1; (e) LHPP-2 and (f) LHPP-3.

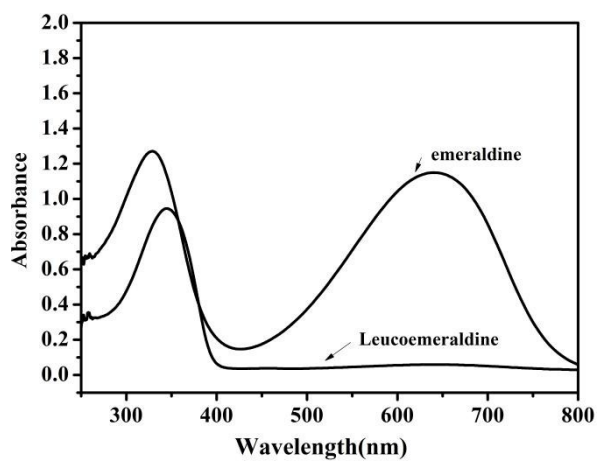

**Fig S2.** UV-Vis spectra of emeraldine and leucoemeraldine.

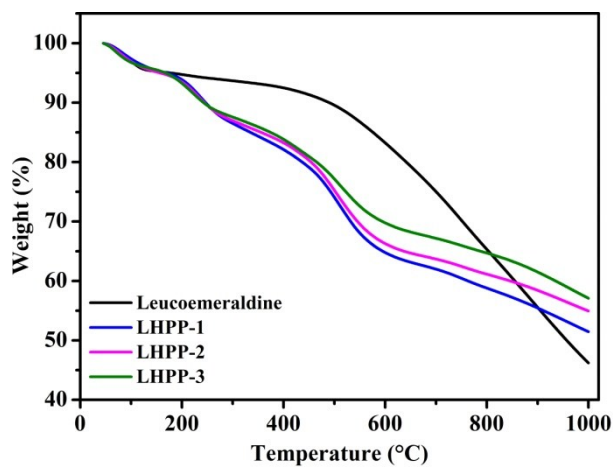

**Fig S3.** TGA curves of leucoemeraldine, LHPP-1, LHPP-2 and LHPP-3.
